# Supplementary material for: A rescued dataset of sub-daily meteorological observations for Europe and the southern Mediterranean region, 1877–2012
Source: Copernicus journal article supplement (doi:10.5194/essd-10-1613-2018), 2018-09-10
Supplement: Supplementary file 1 [file essd-10-1613-2018-supplement.zip]

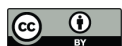

## *Supplement of*

# **A rescued dataset of sub-daily meteorological observations for Europe and the southern Mediterranean region, 1877–2012**

**Linden Ashcroft et al.**

*Correspondence to:* Linden Ashcroft ([linden.ashcroft@bom.gov.au](mailto:linden.ashcroft@bom.gov.au))

- [essd-10-1613-2018-supplement-title-page.pdf](#)
- [Ashcroft\\_etal\\_UERRA\\_SupplementTable1.xlsx](#)
- [Ashcroft\\_etal\\_UERRA\\_SupplementTable2.docx](#)
- [Ashcroft\\_etal\\_UERRA\\_SupplementTable3.xlsx](#)

The copyright of individual parts of the supplement might differ from the CC BY 4.0 License.
